# Supplementary material for: Insight into the thermal decomposition of ammonium hexahalogenoiridates(iv) and hexachloroiridate(iii)
Source: Royal Society of Chemistry journal article supplement (doi:10.1039/d0cp02743j), 2020-01-01
Supplement: d0cp02743j1.pdf [file d0cp02743j1.pdf]

## Supporting information for

# INSIGHT OF THE THERMAL DECOMPOSITION OF AMMONIUM HEXAHALOGENOIRIDATES(IV) AND HEXACHLOROIRIDATE(III)

Kirill V. Yusenko,<sup>†,\*</sup> Valentina V. Zvereva,<sup>‡</sup> Svetlana A. Martynova,<sup>‡,#</sup> Igor P. Asanov,<sup>‡</sup>

Camille La Fontaine,<sup>£</sup> Olga Roudenko,<sup>£</sup> Alexander I. Gubanov,<sup>‡,#</sup>

Sergey V. Korenev,<sup>‡,#</sup> Tatyana I. Asanova,<sup>‡,\*</sup>

<sup>†</sup> BAM Federal Institute of Materials Research and Testing, Richard-Willstätter Str. 11, D-12489 Berlin, Germany

<sup>‡</sup> Nikolaev Institute of Inorganic Chemistry, Lavrentiev ave. 3, 630090 Novosibirsk, Russia

<sup>#</sup> Novosibirsk State University, Pirogova str. 2, 630090 Novosibirsk, Russia

<sup>£</sup> Synchrotron SOLEIL, Saint-Aubin, Gif-sur-Yvette, France

**Table S1.** Thermal decomposition parameters for  $(\text{NH}_4)_3[\text{IrCl}_6] \cdot \text{H}_2\text{O}$ ,  $(\text{NH}_4)_2[\text{IrCl}_6]$  and  $(\text{NH}_4)_2[\text{IrBr}_6]$ .

| Compound                                                  | Atmosphere   | Step | $\Delta T_{\text{step}} (\text{°C})$ | T(°C) | $\Delta m$ (wt.%) | $\Delta m$ (a.e.m.) | gaseous products                      |
|-----------------------------------------------------------|--------------|------|--------------------------------------|-------|-------------------|---------------------|---------------------------------------|
| $(\text{NH}_4)_3[\text{IrCl}_6] \cdot \text{H}_2\text{O}$ | $\text{H}_2$ | 2    | 90-160                               | 111   | 4.2               | 19.8                | $\text{H}_2\text{O}$                  |
|                                                           |              |      | 160-300                              | 274   | 52.9              | 251.2               | $\text{HCl}, \text{N}_2, \text{NH}_3$ |
| $(\text{NH}_4)_3[\text{IrCl}_6] \cdot \text{H}_2\text{O}$ | He           | 3    | 50-150                               | 118   | 3.76              | 17.9                | $\text{H}_2\text{O}$                  |
|                                                           |              |      | 150-270                              | 221   | 8.94              | 42.5                | HCl                                   |
|                                                           |              |      | 270-400                              | 354   | 47.2              | 224.1               | $\text{N}_2, \text{HCl}, \text{NH}_3$ |
| $(\text{NH}_4)_2[\text{IrCl}_6]$                          | $\text{H}_2$ | 3    | 150-215                              | 188   | 11.6              | 51.1                | $\text{N}_2, \text{HCl}$              |
|                                                           |              |      | 215-310                              | 290   | 31.4              | 137.8               | HCl                                   |
|                                                           |              |      | 310-350                              | 322   | 12.3              | 54.0                | $\text{HCl}, \text{NH}_3$             |
| $(\text{NH}_4)_2[\text{IrCl}_6]$                          | He           | 1    | 345-430                              | 406   | 55.3              | 242.7               | $\text{HCl}, \text{N}_2, \text{NH}_3$ |
| $(\text{NH}_4)_2[\text{IrBr}_6]$                          | $\text{H}_2$ | 3    | 160-340                              | 235   | 16.8              | 117.8               | $\text{HBr}, \text{N}_2, \text{NH}_3$ |
|                                                           |              |      |                                      | 287   | 53.2              | 373.9               |                                       |
| $(\text{NH}_4)_2[\text{IrBr}_6]$                          | He           | 3    | 355-480                              | 457   | 35.8              | 251.8               | $\text{HBr}, \text{N}_2, \text{NH}_3$ |
|                                                           |              |      | 480-525                              | 514   | 15.1              | 105.9               |                                       |
|                                                           |              |      | 525-575                              | 555   | 18.9              | 132.9               |                                       |

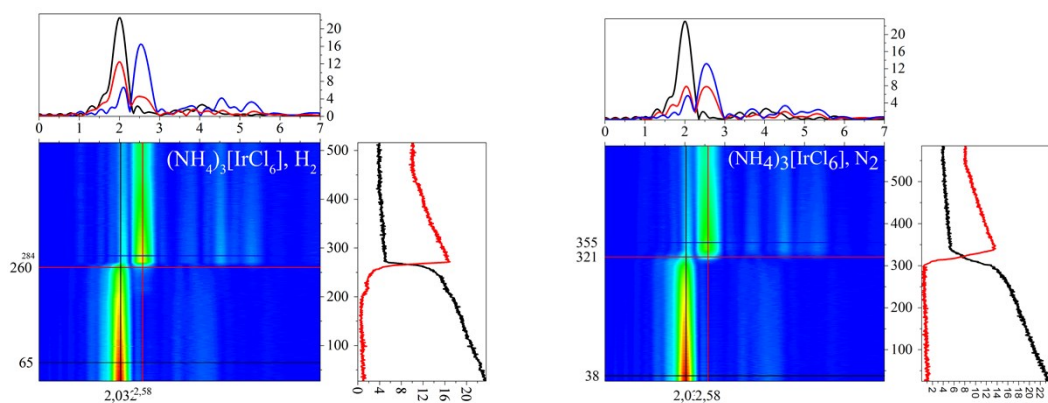

**Figure S1.** 2D-FT map with magnitude profiles of FT corresponding to Ir–Cl (black curve) and Ir–Ir (red curve) FT peaks and FTs at 65, 260 and 284 °C in H<sub>2</sub> (left) and 38, 321 and 355 °C in N<sub>2</sub> (right).

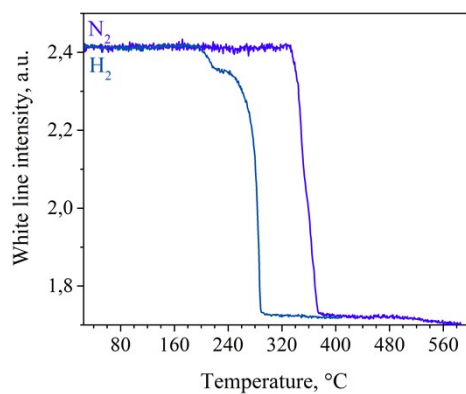

**Figure S2.** Temperature behavior of the White line intensity at Ir L<sub>III</sub>-edge for (NH<sub>4</sub>)<sub>3</sub>[IrCl<sub>6</sub>]·H<sub>2</sub>O in N<sub>2</sub> and H<sub>2</sub> atmospheres.

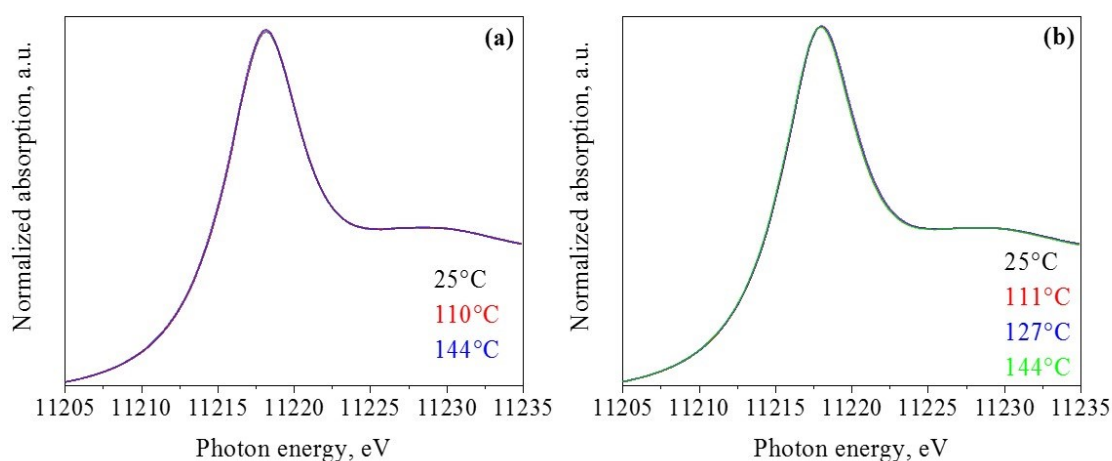

**Figure S3.** XANES spectra at Ir L<sub>III</sub>-edge for (NH<sub>4</sub>)<sub>3</sub>[IrCl<sub>6</sub>]·H<sub>2</sub>O at room temperature and above 100 °C, where there is no crystalline water.
